# Supplementary material for: Consensus and evidence-based medication review to optimize and potentially reduce psychotropic drug prescription in institutionalized dementia patients
Source: Springer Nature journal article supplement (doi:10.1186/s12877-018-1015-9), 2019-01-08
Supplement: MOESM1 [file 16385084]

---

Guia de  
recomanacions  
terapèutiques per  
l'abordatge dels  
Síntomes  
Psicològics i  
Conductuals  
relacionats amb la  
Demència (SPCD)

---

Abril 2012

---

 Institut Català de la Salut  
Servei d'Atenció Primària  
Barcelonès Nord i Maresme

---

 **CONSORCI SANITARI  
DEL MARESME**

---

## COORDINACIÓ

Espinosa, M<sup>a</sup> Carmen (Geriatra, CSdM)

Massot, Mireia (Farmacèutica, ICS)

## AUTORS

Cristòfol, Ramon (Geriatra, CSdM)

López Faixó, David (Farmacèutic, CSdM)

Peláez, Jordi (Farmacèutic, CatSalut)

Rodríguez Darriba, Mercè (Farmacèutica, CatSalut)

Sanz, Pilar (Neuròloga, CSdM)

Sehabiaga, Pedro (Psiquiatre, CSMA-Maresme Sud - Comunidad Terapéutica del Maresme)

Tria, Carles (Metge de Família, CSdM)

Tristany, Montserrat (Metgessa de Família, ICS)

## **JUSTIFICACIÓ**

La demència es una malaltia degenerativa que cursa amb deteriorament de la memòria i de al menys una del resta de les funcions cognitives, produint discapacitat ocupacional o social.

Les demències cursen molt freqüentment amb símptomes neuropsiquiàtrics, anomenats també símptomes psicològics i conductuals associats a la demència (SPCD). Aquests SPCD produeixen un gran estrés en el pacient i en el cuidador, afectant a la qualitat de vida de tots ells.

La presència de símptomes com agitació, irritabilitat, trastorns de la son, il·lusions, al·lucinacions o agressió són una de las consultes més freqüents dels pacients afectats de demència, on, a vegades són desencadenants de ingressos hospitalaris o en residència geriàtrica<sup>1</sup>.

Durant un període de cinc anys, com a mínim el 90% desenvolupa algun símptoma que en el 85% de los casos, pot arribar a tenir implicacions clíniques importants<sup>2</sup>.

Diferents estudis han demostrat l'existència d'una relació entre el grau de deteriorament cognitiu i la freqüència i severitat d'aquests símptomes, o al menys per alguns d'aquests símptomes. La història natural de la demència revela que pacients amb símptomes psicòtics presenten un deteriorament cognitiu més ràpid.

Els símptomes psicòtics són més freqüents en las fases moderades i severes de la malaltia. Per el contrari, la relació de la depressió amb l'estadi de la malaltia és menys clara, però alguns estudis apunten que hi hauria una relació inversa, present en les fases primerenques de la malaltia i absent en las fases més severes. No obstant, aquest fet també pot ser degut a la problemàtica del diagnòstic de la depressió en estadiatges avançats de la malaltia, que a una reducció de la prevalència<sup>3</sup>.

## **VALORACIÓ PER ATENCIÓ PRIMÀRIA**

La valoració i el tractament tant farmacològic com no farmacològic des de l'atenció primària es realitzarà per agrupacions de símptomes.

En la demència els SPCD s'agruparen de la següent manera:

### **GRUPS DE SÍMPTOMES**<sup>1,4</sup>

1. Apatia
2. Agressivitat

- ▶ resistència agressiva, agressivitat física i verbal.

### 3. Agitació/agitació psicomotora

- ▶ caminar incessantment i/o sense sentit, seguir a altres, inquietud, accions repetitives i trastorn circadià.

### 4. Depressió

- ▶ tristesa, plor, desesperança, culpa, ansietat.

### 5. Psicosis

- ▶ al·lucinacions, deliris.
- ▶ *falses identifikacions- no es un trastorno psicòtic.*

### 6. Trastorns de la son

## SÍMPTOMES DE DIFÍCIL CONTROL <sup>5</sup>

Davant d'una consulta per un SPCD, hem de tenir en compte un aspecte fonamental. No tots els símptomes podran ser tractats amb un medicament. Quan aquests símptomes, sí poden ser tractats amb un medicament, és necessària la revaloració constant del pacient, ja que el seu estat degeneratiu varia ràpidament i amb aquest, els SPCD associats, cosa que fa imprescindible la revaloració de la necessitat o no de tractament al llarg del temps.

En la següent taula es relaciona els símptomes que generalment no responen al tractament i els símptomes que potser puguin respondre.

| Comportaments que generalment no responen al tractament                                                                                                                                                                                                                                                                                                    | Comportaments que potser responguin al tractament                                                                                                                                                                                                                                                                                                                                                                                                                        |
|------------------------------------------------------------------------------------------------------------------------------------------------------------------------------------------------------------------------------------------------------------------------------------------------------------------------------------------------------------|--------------------------------------------------------------------------------------------------------------------------------------------------------------------------------------------------------------------------------------------------------------------------------------------------------------------------------------------------------------------------------------------------------------------------------------------------------------------------|
| <ul style="list-style-type: none"> <li>▶ Deambulació erràtica.</li> <li>▶ Orinar i defecar en llocs inapropiats.</li> <li>▶ Vestir-se i desvestir-se en llocs inapropiats.</li> <li>▶ Comportaments repetitius.</li> <li>▶ Amagar/acumular.</li> <li>▶ Pica (menjar coses no comestibles)</li> <li>▶ Aïllament.</li> <li>▶ Arrancar-se la roba.</li> </ul> | <ul style="list-style-type: none"> <li>▶ Agressivitat física.</li> <li>▶ Agressivitat verbal.</li> <li>▶ Ansietat, inquietud psicomotriu.</li> <li>▶ Tristesa.</li> <li>▶ Crits.</li> <li>▶ Anorèxia.</li> <li>▶ Apatia.</li> <li>▶ Trastorn de la son.</li> <li>▶ Deambulació erràtica amb agitació i agressivitat.</li> <li>▶ Comportaments vocals repetitius.</li> <li>▶ Il·lusions/al·lucinacions.</li> <li>▶ Comportament sexual inapropiat amb agitació</li> </ul> |

## CONSIDERACIONS GENERALS PER L'ABORDATGE NO FARMACOLÒGIC I FARMACOLÒGIC DELS SPCD<sup>6-22</sup>

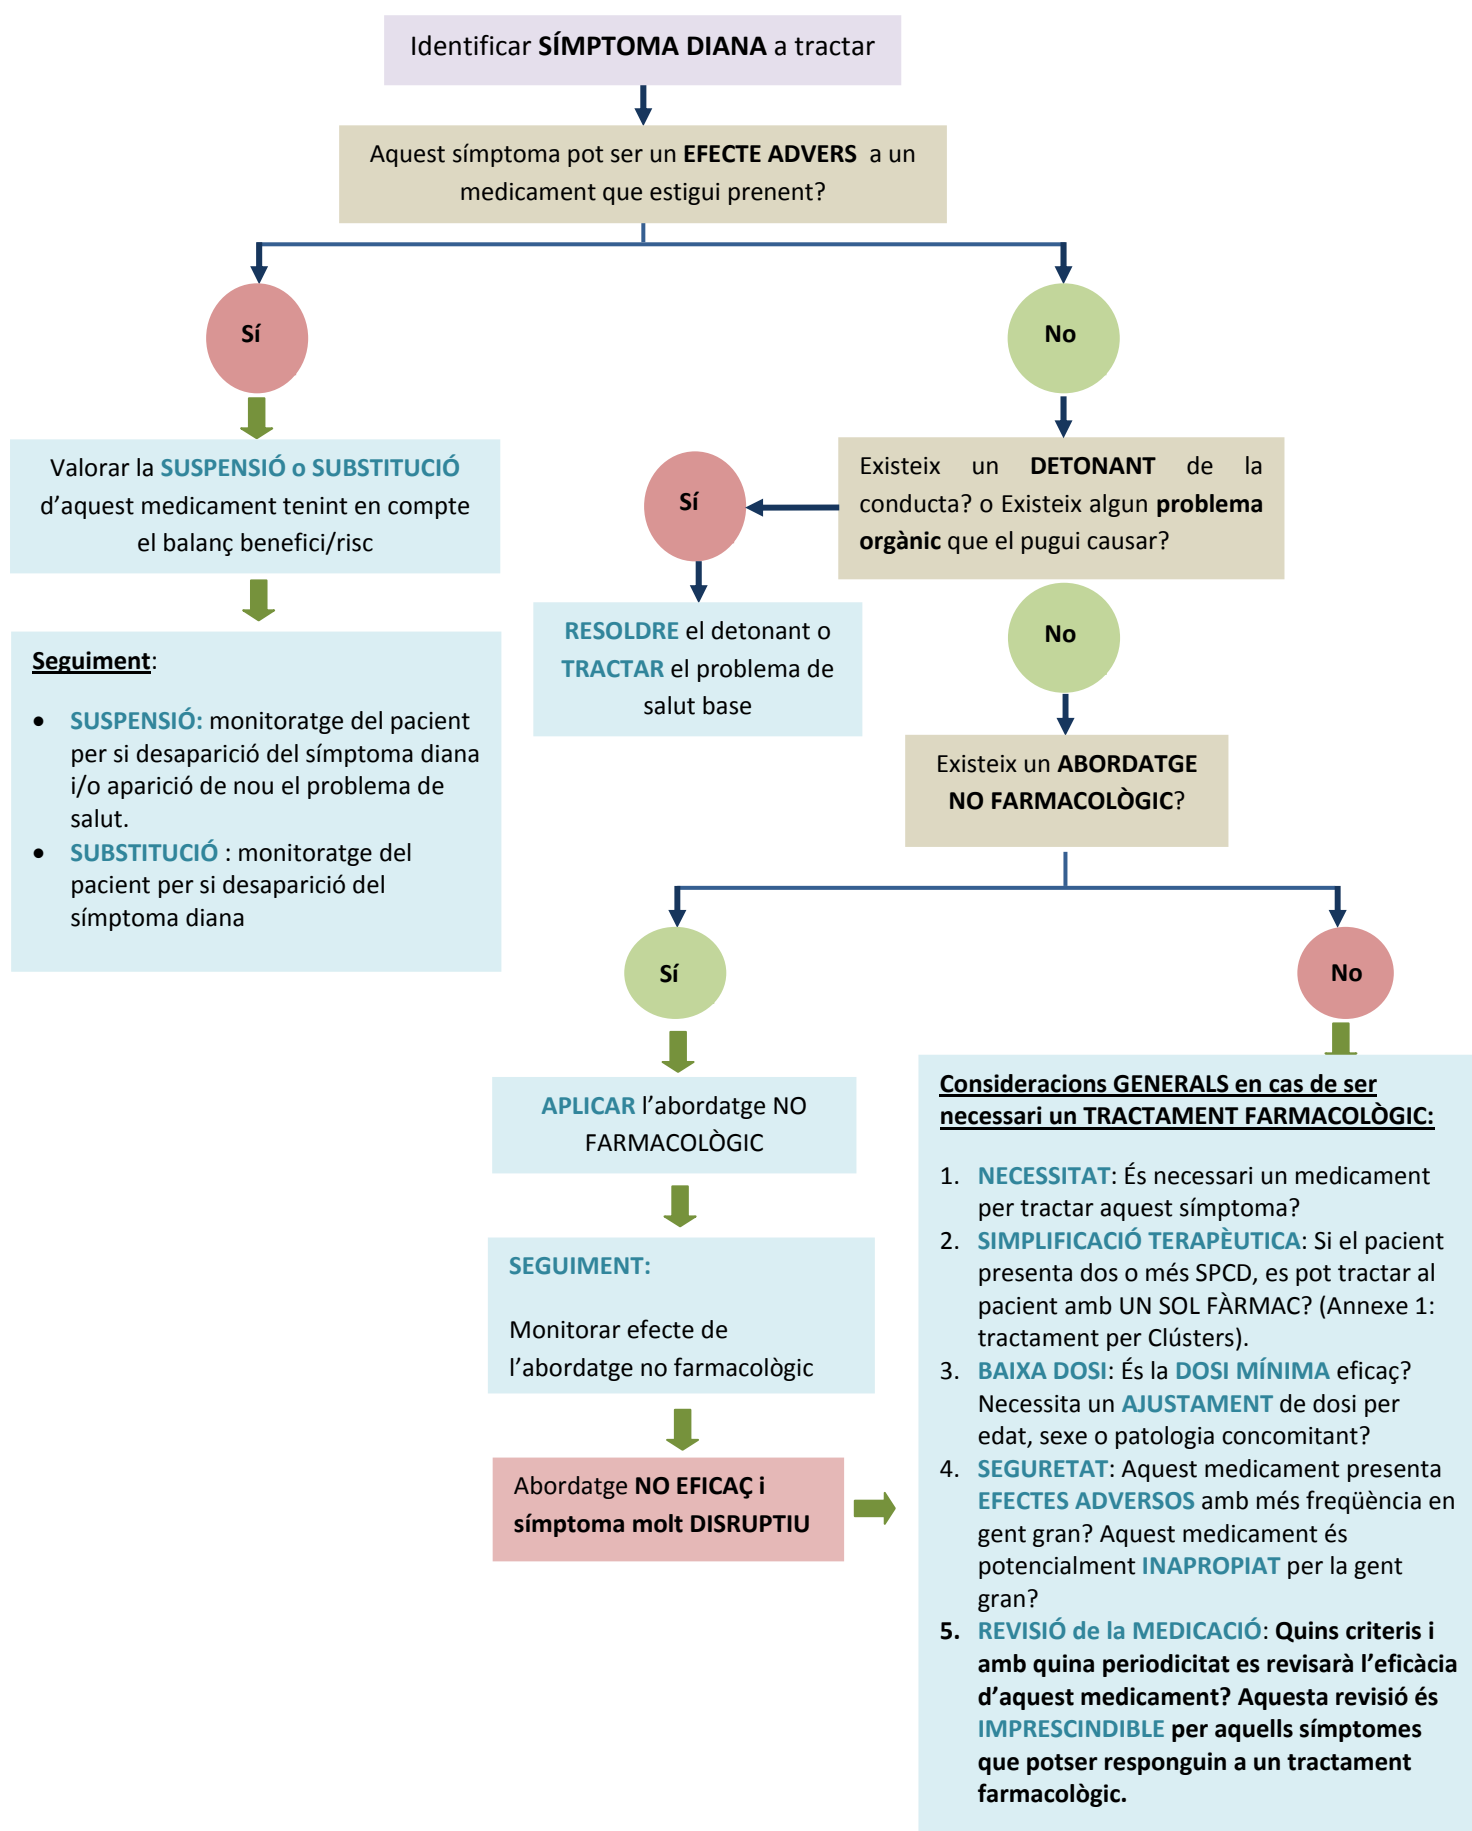

### **Recomanacions abordatge NO farmacològic**

- Intervenció precoç per evitar l'escalada del símptoma.
- Mantenir la calma, abordar-lo amb suavitat, utilitzar un to de veu baix i mirar-lo als ulls.
- Explicar en cada moment al pacient què se li va a fer, amb paraules senzilles.
- Proveir una rutina al pacient (hora de llevar-se i anar-se'n a dormir, etc.).
- Simplificar les tasques, per que pugui realitzar-les.
- Reduir l'estimulació excessiva, inclús el soroll de la Televisió, ràdio, conversacions,...
- Buscar un entorn segur: retirar catifes, terres relliscosos, obstacles, cordons elèctrics,...
- Utilitzar música, preferiblement la que agradi al pacient, durant activitats com menjar i bany.
- Mantenir la llum per la tarda/nit per reduir la confusió i la inquietud nocturna.
- La contenció mecànica **és inacceptable**.

### **Consideracions a la prescripció de antipsicòtics<sup>9</sup>**

- ▶ **Revisar** els factors de risc cardiovascular i/o malalties cardiovasculars.
- ▶ **Escollir** el fàrmac més indicat i iniciar a **dosis baixes**.
- ▶ **Explicar** els possibles efectes positius i negatius de la medicació.
- ▶ **Discutir** la seva prescripció amb el representant/responsable del pacient.
- ▶ Indicar els atípics.
- ▶ **Es pauten quan** l'agitació/simptomatologia psicòtica **no** ha respost al maneig ambiental i la intensitat és important.
- ▶ L'ús d'antipsicòtics s'ha d'iniciar a la **mínima dosi disponible** amb un **seguiment estret** dels pacients amb l'objectiu de mantenir-los el **mínim temps possible a la mínima dosi eficaç**.
- ▶ Els antipsicòtics<sup>16,17</sup> disposen de la millor evidència per al tractament a curt termini de l'agressivitat i l'agitació amb idees delirants, però no han demostrat benefici en el tractament dels símptomes no agressius de l'agitació.
- ▶ **Mantenir** durant un període d'**un mes aproximadament** i **suspènere si la resposta o el benefici no es clar**.
- ▶ Si la resposta és bona, re considerar el seu manteniment a las 6-12 setmanes de la seva prescripció.
- ▶ **El temps recomanat d'espera per al canvi** de fàrmac si la resposta és inadequada és de **5 a 7 dies**, **mantenint-se de 1 a 3 mesos** una vegada aconseguit el control de símptomes i intentant posteriorment una **retirada paulatina el més precoç possible**, segons intensitat i recurrències del símptoma.

## Els criteris STOPP/START<sup>23</sup>

S'han publicat recentment uns criteris, anomenats STOPP-START (Screening Tool of Older Person's potentially inappropriate Prescriptions/Screening Tool to Alert doctors to the Right, i.e. appropriate, indicated Treatment), nascuts a Irlanda, on el seu desenvolupament clínic ha estat assumit per l'European Union Geriatric Medicine Society. Aquests criteris, organitzats per sistemes fisiològics, recullen els errors més comuns de tractament i omisió en la prescripció i són fàcils de relacionar amb els diagnòstics actius i la llista de fàrmacs que apareixen en les històries clíniques informàtiques dels pacients. Consten, en realitat, de dos grups de criteris: els STOPP (per la paraula anglesa "parar") i els START (per "començar").

Els criteris STOPP, com ja s'ha mencionat anteriorment, s'organitzen per sistemes fisiològics. Per el desenvolupament d'aquesta Guia terapèutica dels SPCD, només exposarem els criteris STOPP relacionats amb la medicació necessària per tractar aquests símptomes.

### 1. Sistema Nerviós central i psicofàrmacs:

- a. Antidepressius tricíclics (ATC) amb demència (*risc d'empitjorament del deteriorament cognitiu*).
- b. ATC amb glaucoma (*possible exacerbació del glaucoma*).
- c. ATC amb trastorns de la conducció cardíaca (*efectes pro arrítmics*).
- d. ATC amb estrenyiment (*possible empitjorament de l'estrenyiment*).
- e. ATC amb un opiaci o un Antagonista del calci (*risc de estrenyiment greu*).
- f. ATC amb prostatisme o amb antecedents de retenció urinària (*risc de retenció urinària*).
- g. Us prolongat (i.e. més de 1 mes) de benzodiazepines de vida mitja llarga (com clordiazepòxid, flurazepam, nitrazepam, clorazepat) o benzodiazepines amb metabòlits de llarga acció (com diazepam) (*risc de sedació prolongada, confusió, trastorns de l'equilibri, caigudes*).
- h. Us prolongat (i.e. més de 1 mes) de neurolèptics com hipnòtics a llarg termini (*risc de confusió, hipotensió, efectes extrapiramidals, caigudes*).
- i. Us prolongat de neurolèptics (i.e. més de 1 mes) en el parkinsonisme (*es probable que empitjorin els símptomes extrapiramidals*).
- j. Fenotiazines en pacients amb epilèpsia (*poden baixar l'umbral convulsiu*).
- k. Anticolinèrgics per tractar els efectes secundaris extrapiramidals dels neurolèptics (*risc de toxicitat anticolinèrgica*).
- l. ISRS amb antecedents d'hiponatremia clínicament significativa (*hiponatremia inferior a 130mmol/l no iatrogènica en els dos mesos anteriors*).

m. Us prolongat (més de 1 setmana) d'antihistamínics de primera generació, i.e. difenhidramina, clorfeniramina, ciclizina, prometazina (*risc de sedació i efectes secundaris anticolinèrgics*).

**2. Fàrmacs que afecten negativament als propensos a caure (1 o més caigudes en els últims tres mesos)**

- a. Benzodiazepines (*sedants, poden reduir el sensor, deteriorant l'equilibri*).
- b. Neurolèptics (*poden causar dispràxia de la marxa, parkinsonisme*).
- c. Antihistamínics de primera generació (*sedants, poden reduir el sensor*).
- d. Vasodilatadors dels que se sap que poden causar hipotensió en aquells amb hipotensió postural persistent, i.e. descens recurrent superior a 20mmHg de la pressió sistòlica (*risc de síncope, caigudes*).
- e. Opiacis a llarg termini en aquells amb caigudes recurrents (*risc de somnolència, hipotensió postural, vertigen*).



## 1. Tractament de l'Apatia com a SPCD:

**Definició:** Falta de motivació amb comportament i cognició disminuïts en quant a plantejament d'objectius i un reduït compromís emocional. Ha de ser considerada com significativa, quan representa un canvi en el comportament previ del pacient i/o causa una important discapacitat funcional.

### Recomanacions per l'inici del tractament en l'apatia:

1. Apatia que genera un deteriorament funcional.
2. Potencial de millor en la qualitat de vida (o canvi en la qualitat de vida) del pacient.
3. Angústia/carga dels cuidadors i/o familiars, encara que depen de les expectatives del cuidador, la personalitat pre-mòrbida del pacient i l'entorn en el que està vivint el pacient. Ex. Els membres d'una família poden estar més angustiat si es tracta d'una persona activa que es torna apàtica, mentre que en una residència l'apatia pot ser més ben tolerada.

## Algoritme d'abordatge de l'apatia:

Els medicaments calci-antagonistes, la pentoxifilina i els antiepilèptics no han demostrat eficàcia en el tractament de l'apatia en pacients amb demència.

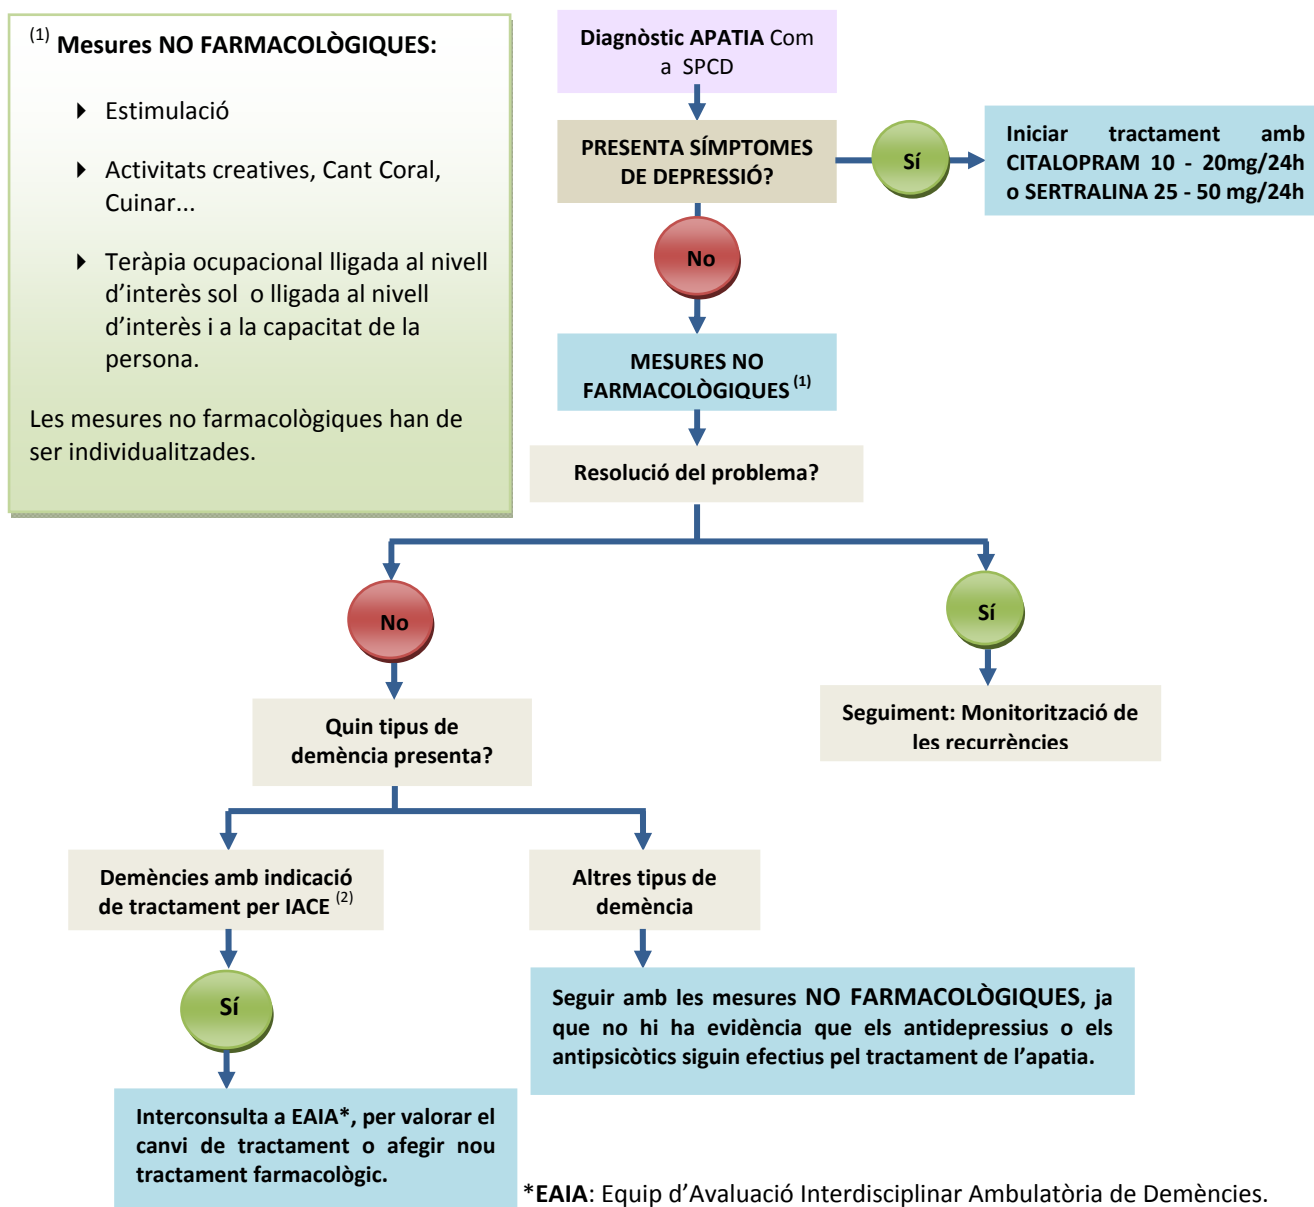

(2) **Criteris tractament amb Inhibidors de l'Acetilcolinesterasa (IACE)** Instrucció 1/2011 Direcció General de Regulació, Planificació i Recursos Sanitaris Departament de Salut.

- I. Malalts amb diagnòstic de "malaltia d'Alzheimer" segons els criteris DSM-IV.
- II. Malalts amb diagnòstic de "malaltia d'Alzheimer probable" segons els criteris NINCDS-ADRDA o amb diagnòstic de "malaltia d'Alzheimer possible" (Demència per cossos de Lewi, mixta o associada a malaltia de Parkinson) en que s'acrediti la necessitat del tractament mitjançant un informe que ho justifiqui.

## 2. Tractament de l'Agressivitat com a SPCD:

**Definició:** Comportament o intenció de fer mal, ofendre a algú mitjançant insults, comentaris o físicament per cops, lesions o violència.

### Algoritme d'abordatge de l'agressivitat:

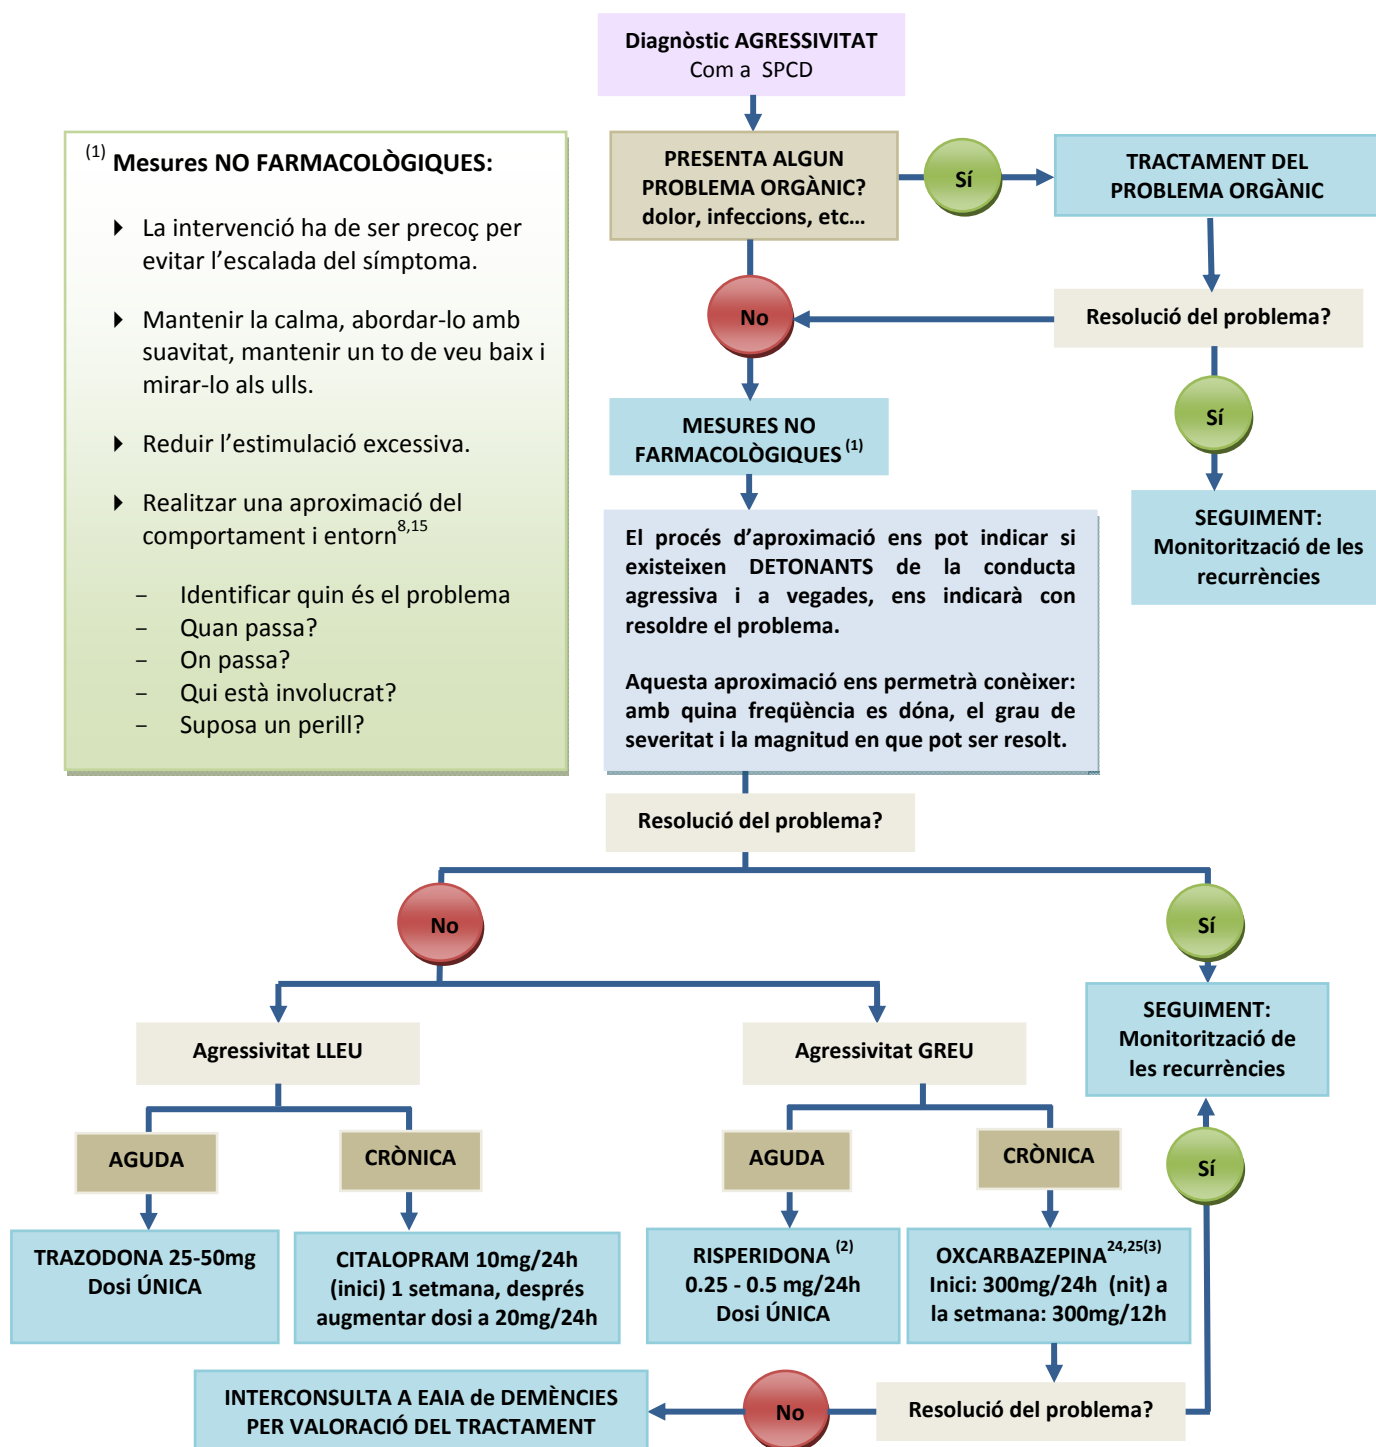

<sup>(2)</sup> Si no control símptomes REPETIR DOSI (dosi màxima 2mg/24h). Els pacients amb la malaltia de Parkinson considerar **QUETIAPINA** 12.5 – 25 mg/24h Dosi ÚNICA.

<sup>(3)</sup> Cal tenir la precaució del risc d'Hiponatrèmia. Si no aconseguim control de símptomes: AFEGIR RISPERIDONA 0.25 a 0.5 mg/dia (dosi màxima de 2mg) mantenir de 1 a 3 mesos, una vegada arribat al control de símptomes retirar el fàrmac paulatinament. Els pacients amb la malaltia de Parkinson considerar **QUETIAPINA** 12.5 – 25 mg/24h, dosi màxima 100 mg/dia. Presenta un efecte hipotensor més marcat que la Risperidona. La retirada es planteja igual que la Risperidona. En cas d'estar tractat prèviament amb ISRS, es recomana la retirada d'aquest fàrmac per tal no associar psicofàrmacs en la gent gran i disminuir els efectes adversos.

### 3. Tractament de l'Agitació/agitació psicomotora com a SPCD:

**Definició:** Excessiva activitat motora associada a un sentiment d'estrés interior.

Es proposa la descripció dels diferents tipus d'agitació que recull Cohen-Mansfiel en la seva escala<sup>26</sup> (annex 2).

Per al tractament adequat de l'agitació **és imprescindible realitzar un diagnòstic diferencial de l'agitació**, ja que en funció de l'origen d'aquest símptoma el tractament, tant farmacològic com no farmacològic diferirà substancialment.

En la gran majoria dels casos d'agitació com a SPCD en gent gran presenten un **SÍNDROME CONFUSIONAL AGUT**, on la base del tractament radica en identificar la causa de l'agitació i resoldre el problema base, deixant el tractament farmacològic per aquells casos en que l'agitació sigui causa d'un Trastorn neuro-psiquiàtric.

**SÍMPTOMES SÍNDROME CONFUSIONAL AGUT:**

- ▶ Deteriorament sobtat
- ▶ Curs fluctuant
- ▶ Al·lucinacions
- ▶ Alteracions de la son

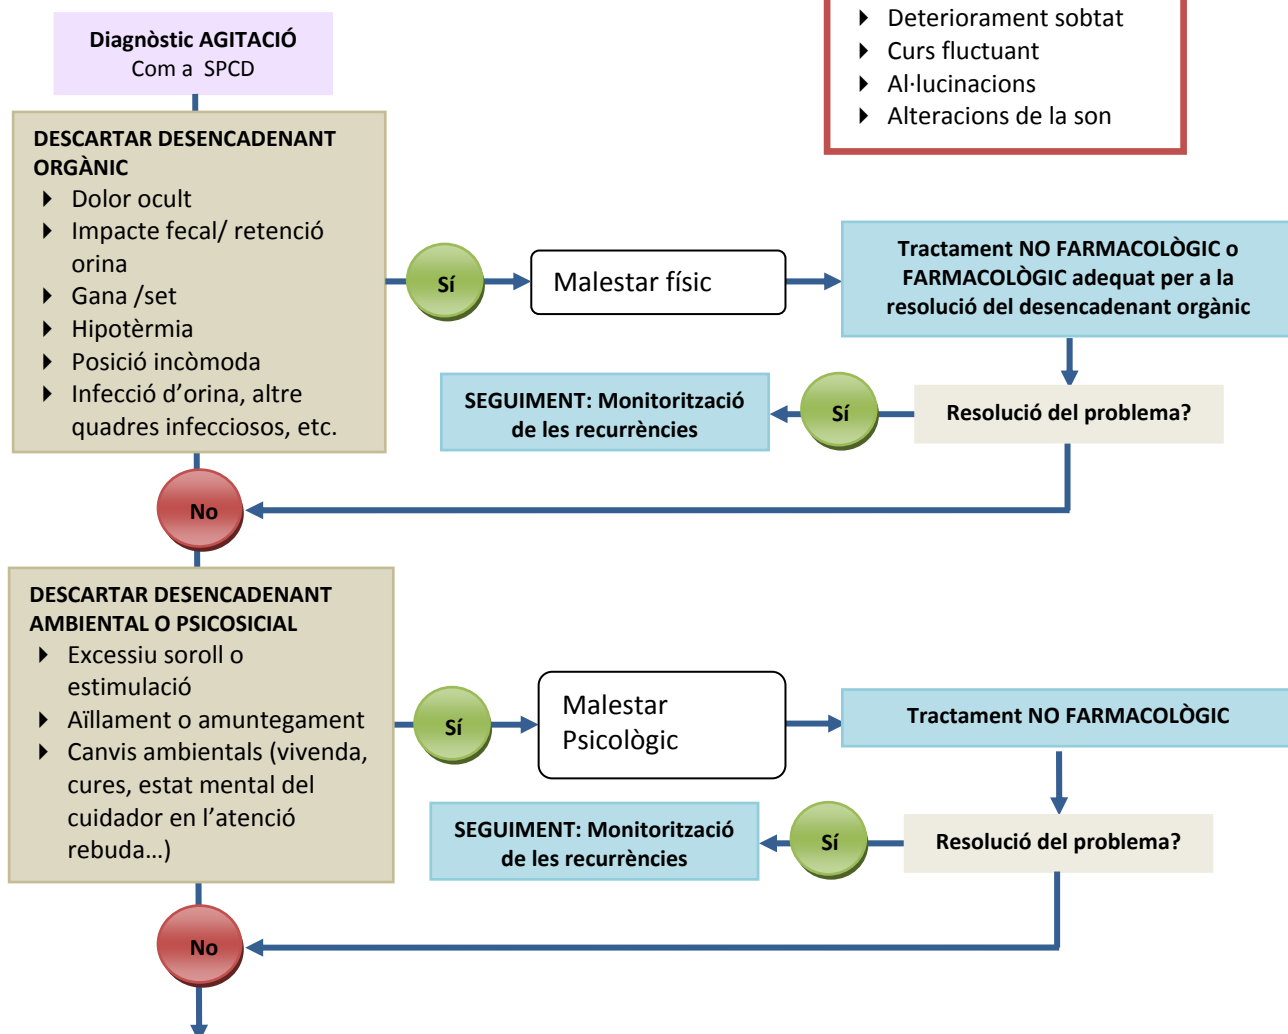

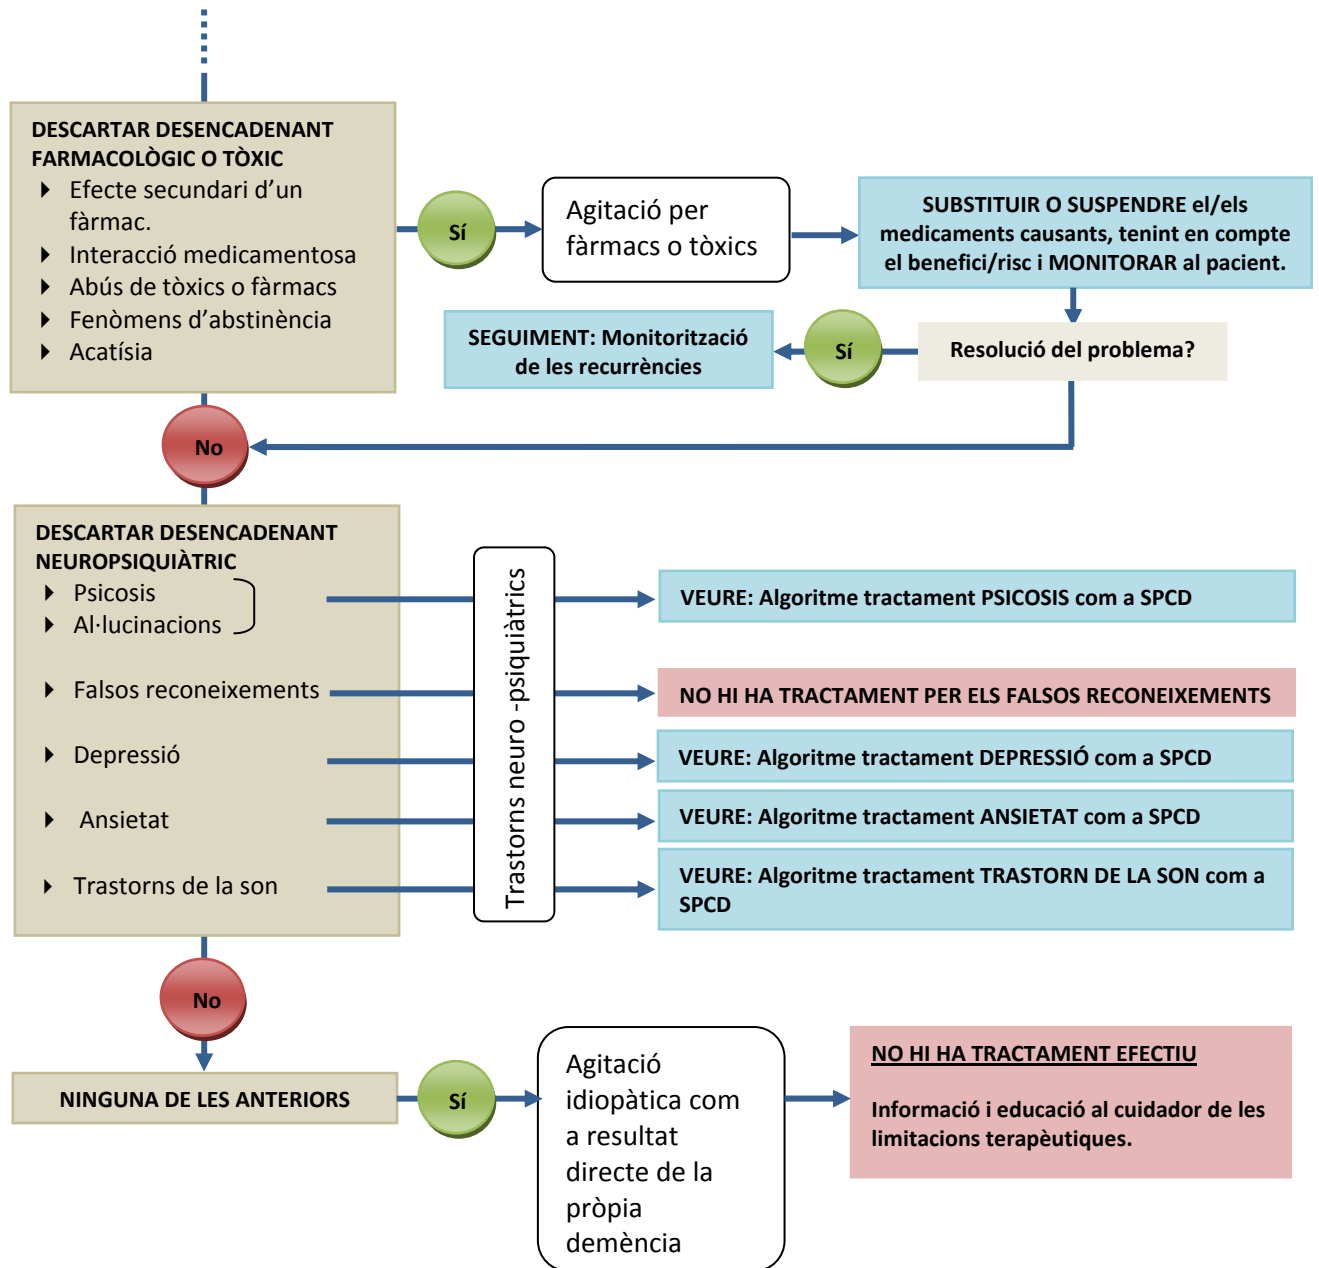

#### 4. Tractament de la Depressió com a SPCD:

**Definició:** Trastorn de l'estat d'ànim caracteritzat per tristesa i incapacitat d'experimentar plaer (anhedonia). Es manifesta a través d'expressions i sentiments d'inutilitat, desesperança, desvalorització, o de culpabilitat injustificats; pensaments recurrents de mort, poca capacitat de concentració, augment de la fatiga i pèrdua d'energia.

El diagnòstic és clínic, on s'ha de descartar prèviament, orgànica, causes tòxiques, farmacològiques, que permetin deixar en clar els criteris per parlar de Depressió.

#### Algorisme d'abordatge de la depressió:

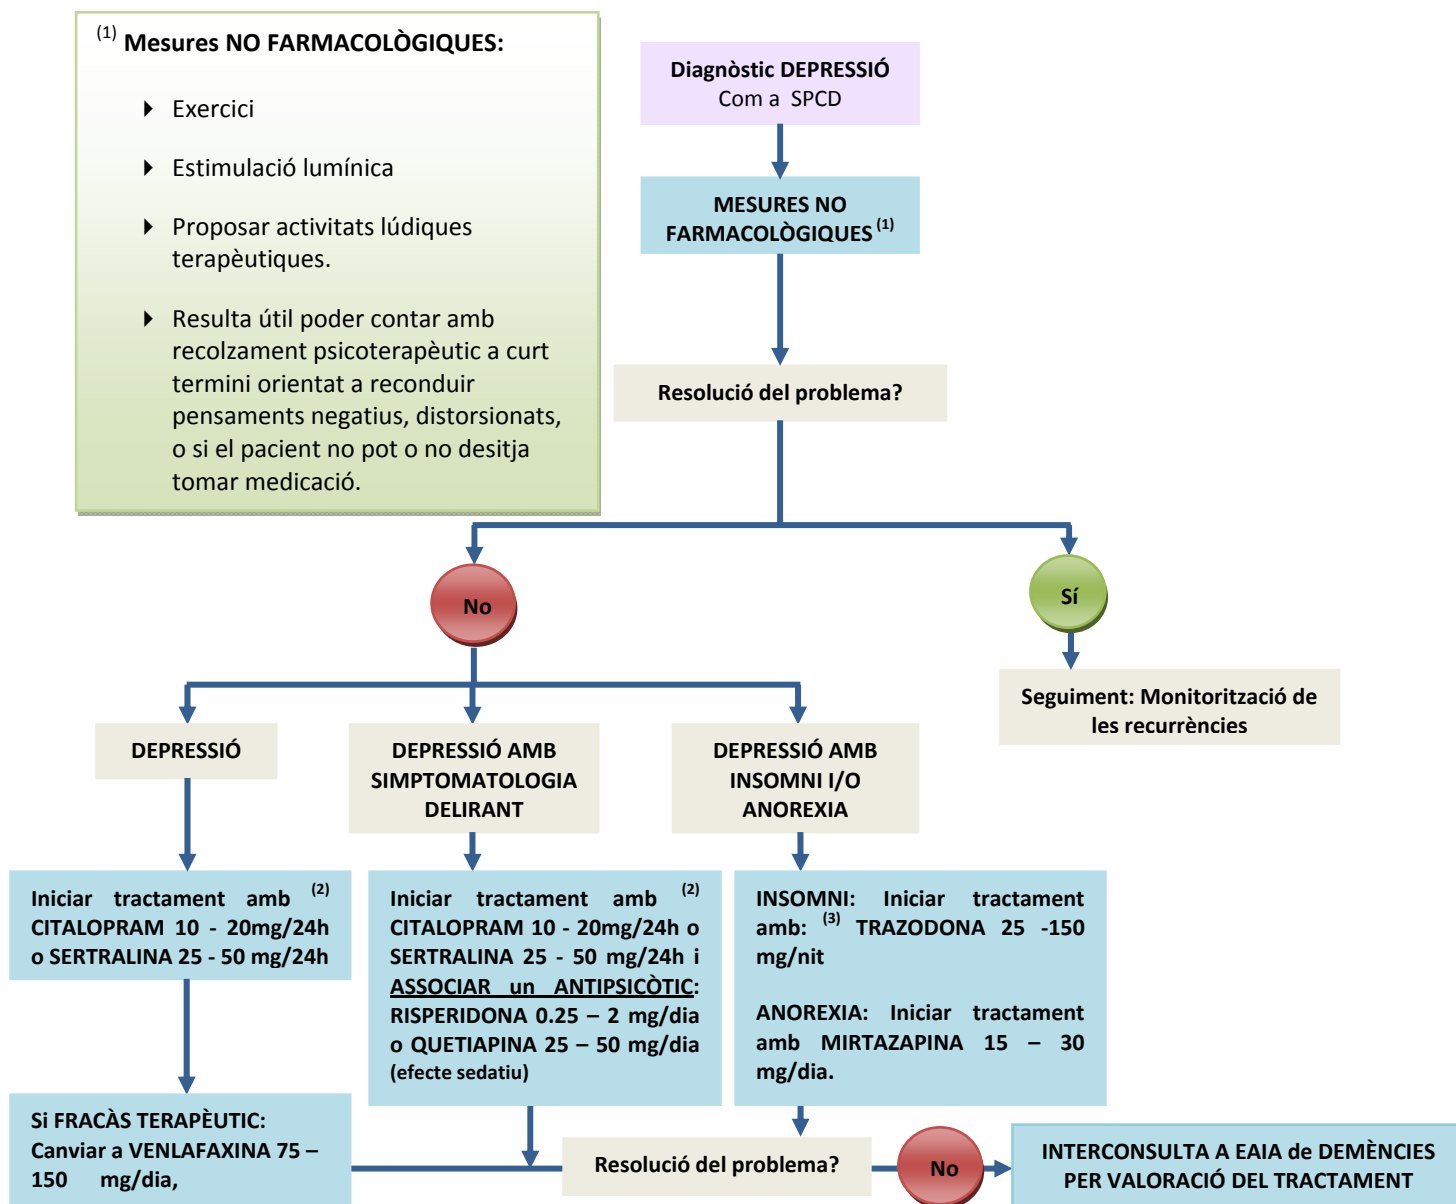

(2) L'inici d'acció dels antidepressius és de 9 a 12 setmanes després d'haver iniciat el tractament. La durada del tractament amb un antidepressiu hauria de ser de 6 a 12 mesos mínim, segons criteri clínic, als efectes de reinstaurar un adequat funcionament del pacient, disminuir la morbiditat i la mortalitat, evitant les recaigudes, sempre que sigui possible.

(3) Recordar que a menor dosi, la Mirtazapina té un major efecte sedant. Un dels efectes adversos que presenta és l'augment de la gana, on haurem de fer un balanç benefici/risc en funció del pacient.

## 5. Tractament de l'Ansietat com a SPCD:

**Definició:** Resposta emocional complexa amb una percepció exagerada i injustificada d'amenaça, mals pressentiments i pensaments de mort imminent, que provoca una activació biològica dirigida a reaccionar front a aquesta percepció.

### Algoritme d'abordatge de l'ansietat:

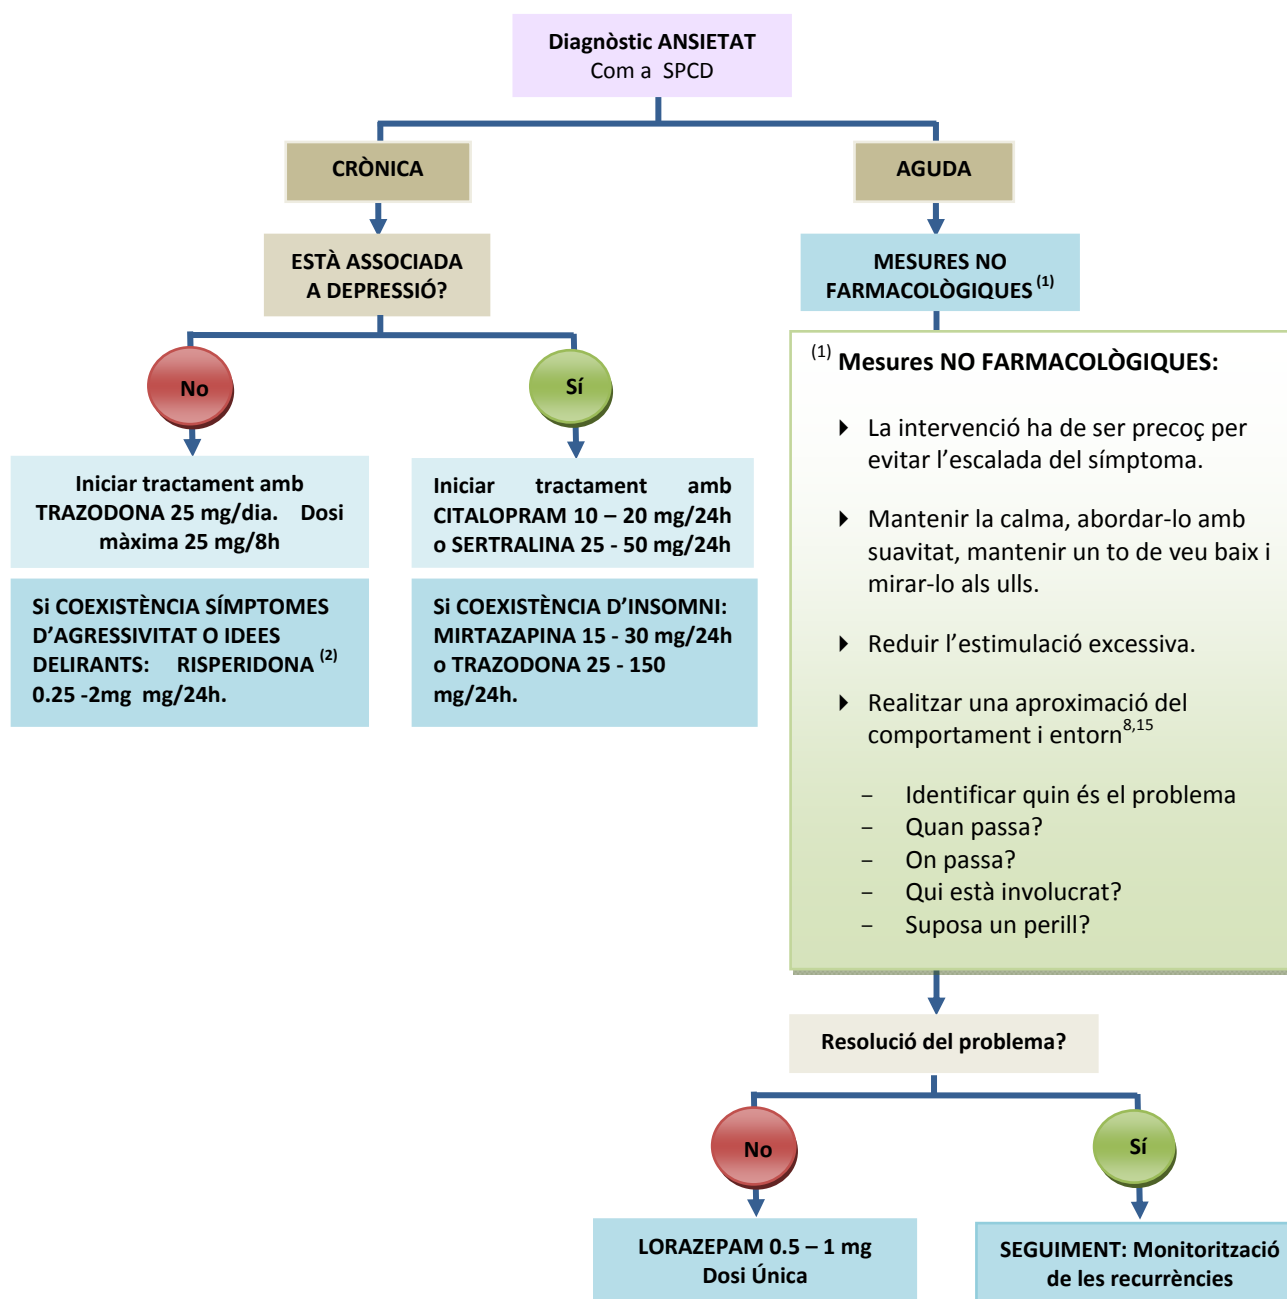

(2) Els pacients amb la malaltia de Parkinson considerar **QUETIAPINA** 12.5 -50 mg/24.



## 6. Tractament de la Psicosi com a SPCD:

### Definició:

Deliris- falses creences basades en inferències incorrectes sobre la realitat externa, que el malalt manté firmament, encara que s'evidenciï el contrari.

Al·lucinacions- percepcions sensorials que donen la mateixa sensació de realitat que una veritable experiència sensorial però que es donen sense estimulació de l'òrgan sensorial rellevant.

Il·lusions- males interpretacions dels estímuls visuals externs. Es distingeixen de les al·lucinacions en que són percepcions distorsionades en lloc de percepcions anormals espontànies.

### Algorisme d'abordatge de la psicosi:

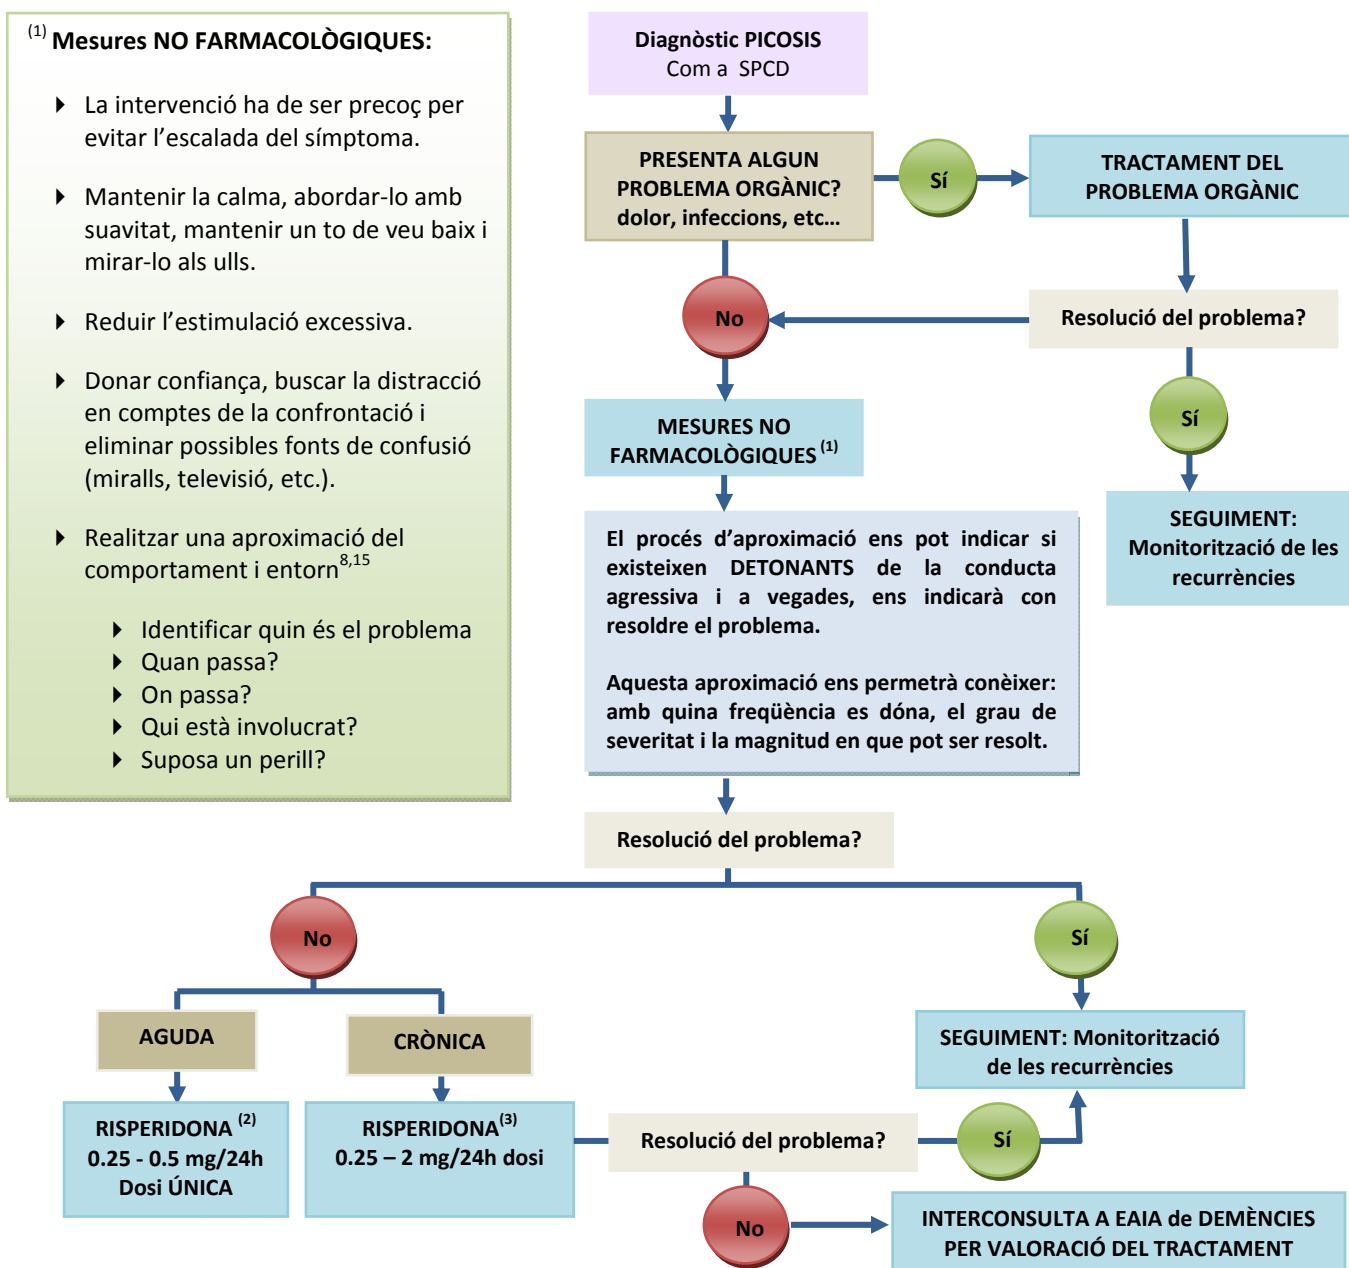

<sup>(2)</sup> Els pacients amb la malaltia de Parkinson considerar **QUETIAPINA** 12.5 – 25 mg/24h Dosi ÚNICA.

<sup>(3)</sup> Mantenir de 1 a 3 mesos, una vegada arribat al control de símptomes retirar el fàrmac paulatinament. Els pacients amb la malaltia de **Parkinson** o presència de **SÍMPTOMES EXTRAPIRAMIDALS** considerar **QUETIAPINA** 12.5 – 25 mg/24h, dosi màxima 100 mg/dia. Presenta un efecte hipotensor més marcat que la Risperidona. La retirada es planteja igual que la Risperidona. En cas d'estar tractat prèviament amb ISRS, es recomana la retirada d'aquest fàrmac per tal no associar psicofàrmacs en la gent gran i disminuir els efectes adversos.

## 7. Tractament dels Trastorns de la son com a SPCD:

**Definició:** dificultat per conciliar la son, la baixa qualitat d'aquesta o la seva fragmentació.

### Algoritme d'abordatge dels trastorns de la son:

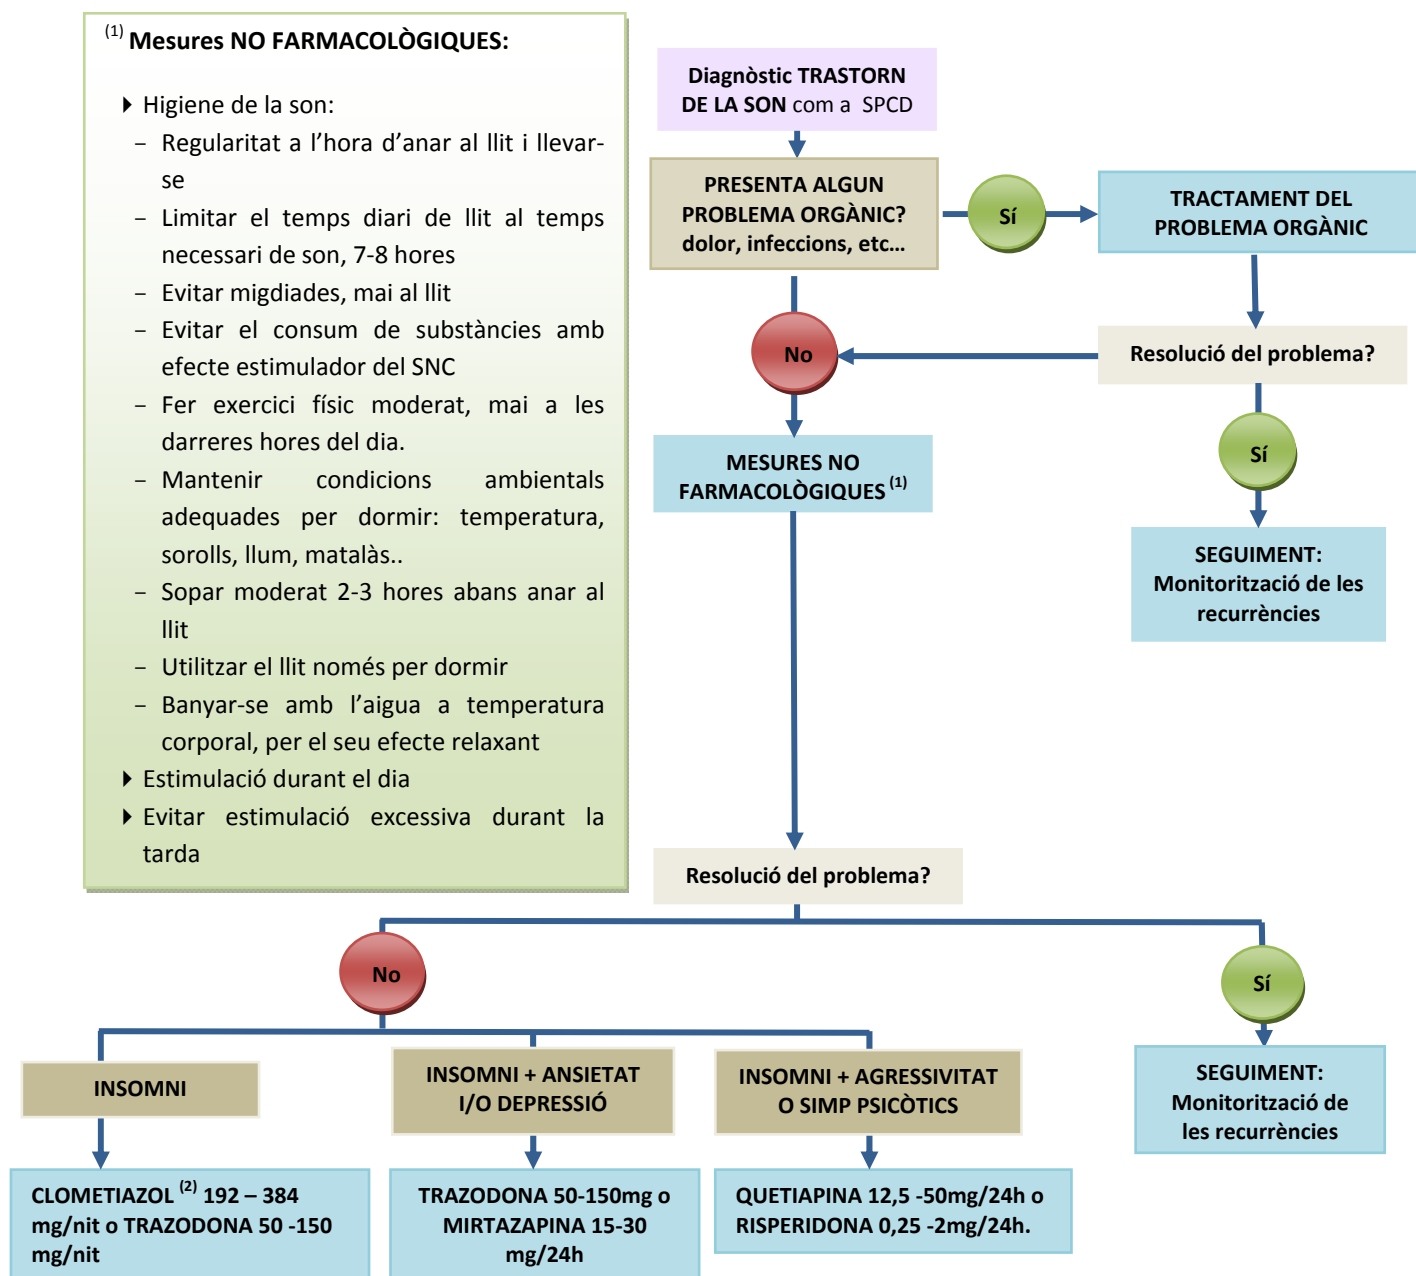

(2) Per la seva tolerància valorar durada curta tractament

#### TRACTAMENTS PER L' INSOMNI:

Pel tractament de l' Insomni, **no es recomana l'addició de més d'un fàrmac psicoactiu**. La recomanació es fonamenta en l'aplicació de mesures higièniques de la son més un únic tractament farmacològic, en cas de fracàs terapèutic es recomana la suspensió del fàrmac i la instauració d'un nou tractament.

### **FÀRMACS QUE ALTEREN EL CICLE DE LA SON:**

Hi ha fàrmacs que alteren el cicle de la son, que, en cas de patir insomni es recomana l'administració d'aquets fàrmacs al matí en comptes de la tarda/nit.

#### **FÀRMACS:**

- DIÜRÈTICS
- VITAMINA B12
- IACE (inhibidors de l'Acetilcolinesterasa)
- Bupropion
- Vareniclina
- Fàrmacs psicoestimulants

## Annexa 1. Tractament farmacològic per Clústers:

En el tractament dels SPCD generalment, ens podem trobar que un pacient no presenti un sol símptoma sinó que manifesti més d'un símptoma a la vegada. Per al tractament d'aquests símptomes es poden agrupar en clústers, permetent simplificar el tractament i evitant així l'ús excessiu de psicofàrmacs en el pacient amb demència.

| Tipus de Clúster                                     | Clúster 1                                          | Clúster 2                                            | Clúster 3                                              |
|------------------------------------------------------|----------------------------------------------------|------------------------------------------------------|--------------------------------------------------------|
| <b>Símptomes psicològics conductuals relacionats</b> | Irritabilitat<br>Ansietat/pànic<br>Humor depressiu | Agressivitat<br>Agitació<br>psicomotorora<br>Psicosi | Inestabilitat afectiva<br>Impulsivitat<br>Agressivitat |
| <b>Tratamiento</b>                                   | ISRS                                               | Antipsicòtics                                        | OXCARBAZEPINA                                          |

## Annexa 2. Cohen – Mansfiel Agitation Inventori (CMAI)<sup>26</sup>

| Sense agressivitat física                                                                                                                                                                                                                                                                                                     | Amb agressivitat verbal                                                                                                                                                                        |
|-------------------------------------------------------------------------------------------------------------------------------------------------------------------------------------------------------------------------------------------------------------------------------------------------------------------------------|------------------------------------------------------------------------------------------------------------------------------------------------------------------------------------------------|
| <ul style="list-style-type: none"> <li>▶ Inquietud psicomotora</li> <li>▶ Comportaments repetitius</li> <li>▶ Deambulació erràtica</li> <li>▶ Amagar objectes</li> <li>▶ Agafar i tocar tot</li> <li>▶ Síndrome crepuscular</li> <li>▶ Tendència a marxar</li> <li>▶ Vestir-se i desvestir-se en llocs inapropiats</li> </ul> | <ul style="list-style-type: none"> <li>▶ Cridar</li> <li>▶ Maleir</li> <li>▶ Exabruptes</li> <li>▶ Comentaris socialment inapropiats</li> </ul>                                                |
| Amb agressivitat física                                                                                                                                                                                                                                                                                                       | Sense agressivitat verbal                                                                                                                                                                      |
| <ul style="list-style-type: none"> <li>▶ Colpejar</li> <li>▶ Empènyer</li> <li>▶ Esgarrapar</li> <li>▶ Agafar-se</li> <li>▶ Donar patades</li> <li>▶ Mossegar</li> <li>▶ Escopir</li> </ul>                                                                                                                                   | <ul style="list-style-type: none"> <li>▶ Negativisme</li> <li>▶ Canturejar</li> <li>▶ Frases repetitives</li> <li>▶ Interrupcions constats</li> <li>▶ Cridar l'atenció Constantment</li> </ul> |

### Annexa 3. Taula relació de dosi recomanades i efectes adversos més rellevants fàrmacs antipsicòtics i antidepressius<sup>27-37</sup>

| Antipsicòtic       | Dosi diària   | Sedació            | SEP       | ACH       | Hipotensió Ortostàtica | DM               |
|--------------------|---------------|--------------------|-----------|-----------|------------------------|------------------|
| <b>RISPERIDONA</b> | 0.5 – 2 mg    | Baixa/<br>Moderada | Baix      | Molt baix | Moderat                | Baix/<br>Moderat |
| <b>QUETIAPINA</b>  | 12.5 – 100 mg | Moderada/<br>alta  | Molt baix | Moderat   | Moderat                | Baix/<br>Moderat |

| Antipsicòtic       | DREE | PROL | DT       | LTR                | Augment de pes   | Lípids  | QTc     |
|--------------------|------|------|----------|--------------------|------------------|---------|---------|
| <b>RISPERIDONA</b> | Si   | Si   | POC COMÚ | Baixa              | Baix/<br>Moderat | Baix    | Baix    |
| <b>QUETIAPINA</b>  | No   | No   | POC COMÚ | Baixa/<br>Moderada | Moderat          | Moderat | Moderat |

SEP: Efectes secundaris extrapiramidals

DM: Diabetis Mellitus

DREE: Efectes extrapiramidals dosi dependent

PROL: Elevació de la prolactina

DT: Discinèsia tardana

ACH: Efectes adversos anticolinèrgics

LTR: Increment dels resultats del test de funció hepàtica

Lípids: Elevacions del colesterol i/o triglicèrids

QTc: Prolongació interval QTc

| Antidepressiu      | Dosi inicial                                     | Dosi mant                      | ACH | Somno-<br>lència | Hipotensió<br>Ortostàtica | GI | Augment de<br>pes |
|--------------------|--------------------------------------------------|--------------------------------|-----|------------------|---------------------------|----|-------------------|
| <b>CITALOPRAM</b>  | 10mg matí                                        | 10-20 mg                       | 0   | 0                | 0                         | 3+ | 1+                |
| <b>SERTRALINA</b>  | 12.5-50mg<br>matí                                | 50-100 mg                      | 0   | 0                | 0                         | 3+ | 1+                |
| <b>TRAZODONA</b>   | 25mg/24h                                         | 100-150<br>mg                  | 0   | 4+               | 3+                        | 1+ | 2+                |
| <b>MIRTAZAPINA</b> | 7.5 mg nit                                       | 15-30 mg                       | 1+  | 3+               | 1+                        | 0  | 3+                |
| <b>VENLAFAXINA</b> | 25mg/24, 12 o<br>8h<br>37.5mg/dia <sup>(1)</sup> | 75-150 mg<br>75 <sup>(1)</sup> | 1+  | 1+               | 0                         | 3+ | 0                 |

**Puntuació: 0 efecte absent o estrany i 4+ efecte relativament comú**

ACH: Efectes adversos anticolinèrgics

GI: Problemes gastrointestinals.

(1): forma farmacèutica de alliberació perllongada

| Altres                           | Dosi inicial        | Mareig/<br>vertigen                                                                                                                                                                                                                     | Somno-<br>lència | Atàxia  | Fatiga   | Hipona-<br>trèmia | GI      |
|----------------------------------|---------------------|-----------------------------------------------------------------------------------------------------------------------------------------------------------------------------------------------------------------------------------------|------------------|---------|----------|-------------------|---------|
| <b>OXCARBAZEPINA</b>             | 300/12-24h          | 22 – 49%<br>6 – 15%                                                                                                                                                                                                                     | 20 – 36%         | 5 – 31% | 12 – 15% | 1 – 10%           | 7 – 36% |
| <b>CLOMETIAZOL</b> <sup>36</sup> | 192 – 384<br>mg/nit | Irritació nasal, irritació conjuntival a vegades associat a mal de cap, increment de les secrecions bronquials o nasofaríngies, nàusees i vòmits, taquicàrdia i hipotensió. Dosis excessives pot produir: Coma, depressió respiratòria, |                  |         |          |                   |         |

hipotensió, hipotèrmia, pneumònia seguida increment secreció respiratòria.

|                  |              |         |                   |         |
|------------------|--------------|---------|-------------------|---------|
| <b>LORAZEPAM</b> | 0.5-2mg /dia | 1 – 10% | >10%<br>(sedació) | 1 – 10% |
|------------------|--------------|---------|-------------------|---------|

#### Annexa 4. Taula maneig IACE<sup>38-41</sup>

| IACE                | Presentació                          | Titulació                                                                               | Dosi<br>Manteniment | Observacions                                                                                                                                               |
|---------------------|--------------------------------------|-----------------------------------------------------------------------------------------|---------------------|------------------------------------------------------------------------------------------------------------------------------------------------------------|
| <b>DONEPEZILO</b>   | Comp<br>Comp flash                   | 5 mg/24h (4 setmanes)                                                                   | 10 mg/24h           | Administrats <b>NIT abans de dormir, en cas d'insomni administrar al matí</b>                                                                              |
|                     | Comprimits<br>Lliberació perllongada | 8 mg/24h (4 setmanes)<br>16 mg/24h (dosi manteniment)                                   | 16 – 24mg/24h       | Administrats al <b>MATÍ AMB ALIMENTS</b>                                                                                                                   |
| <b>GALANTAMINA</b>  | Solució oral (4mg/ml)                | 4mg/12h (4 setmanes)<br>8mg/12h (dosi manteniment)                                      | 8 - 12 mg/12h       | Administrats <b>AMB ALIMENTS a l'esmorzar i al sopar</b>                                                                                                   |
|                     | <b>IH MODERADA</b>                   | 8mg/24h dies alterns (7 dies) administrar al <b>MATÍ</b><br>8mg/24h (4 setmanes)        | 16mg/24h            | Administrats al <b>MATÍ AMB ALIMENTS</b>                                                                                                                   |
| <b>RIVASTIGMINA</b> | Solució oral (2mg/ml)<br>Càpsules    | 1.5mg/12h (15 dies)<br>3mg/12h                                                          | 3 – 6mg/12h         | Administrats <b>AMB ALIMENTS a l'esmorzar i al sopar</b>                                                                                                   |
|                     | Pegats                               | 4.6mg/24h (4 setmanes)<br>9.5mg/24h                                                     | 9.5mg/24h           | Aplicació del pegat en la pell seca, neta intacte i sense pèl. En la zona del superior del braç, esquena o tòrax.                                          |
| <b>MEMANTINA</b>    | Comprimits                           | 1a setmana 5mg/24h<br>2a setmana 10mg/24h<br>3a setmana 15mg/24h<br>4a setmana 20mg/24h | 20 mg/24h           | Administrats <b>sempre a la mateixa hora del dia cada dia</b>                                                                                              |
|                     | Solució oral (5mg/pulsació)          | 1a setmana 5mg/24h<br>2a setmana 10mg/24h<br>3a setmana 15mg/24h<br>4a setmana 20mg/24h | 20mg/24h            | La pulsació s'ha de posar en una cullera o en un got <b>MAI</b> directament a la boca. S'ha d'administrar <b>sempre a la mateixa hora del dia cada dia</b> |

#### SEGUIMENT

- ▶ Revaluar al pacient en un període de temps màxim de 3 a 6 mesos.

- ▶ Si existeixen problemes de tolerància o falta d'efectivitat pot canviar-se de fàrmac o combinar-se els IACE con memantina.
- ▶ Es considera que un fàrmac és eficaç quan s'evidencia l'estabilització de la milloria dels símptomes que s'hagin escollit com a diana (cognitius, conductuals o funcionals).

## EFFECTES ADVERSOS

| IACE                | Somno-<br>lència                                                                                                                                                                                                                                                  | HTA     | Vertigen<br>/mareig | Dispnea | Mal de<br>cap | SEP                    | GI                     |
|---------------------|-------------------------------------------------------------------------------------------------------------------------------------------------------------------------------------------------------------------------------------------------------------------|---------|---------------------|---------|---------------|------------------------|------------------------|
| <b>DONEPEZILO</b>   | -                                                                                                                                                                                                                                                                 | -       | 1 – 10%             | -       | ≥ 10%         | -                      | 1 – 10% <sup>(1)</sup> |
|                     | <b>Altres RAM: Freqüents (1 – 10%):</b> Síncope, Insomni, anorèxia, refredat comú, fatiga, dolor, Incontinència urinària, erupció, pruit, rampes musculars, al·lucinacions, agitació i conducta agressiva (es resol disminuint la dosi o retirant el medicament). |         |                     |         |               |                        |                        |
| <b>GALANTAMINA</b>  | 1 – 10%                                                                                                                                                                                                                                                           | 1 – 10% | 1 – 10%             | -       | 1 – 10%       | -                      | 1 – 10% <sup>(2)</sup> |
|                     | <b>Altres RAM: Freqüents (1 – 10%):</b> Síncope, anorèxia, fatiga, astènia, malestar, espasmes musculars, al·lucinacions, depressió, caigudes, bradicàrdia, hiperhidrosis, pèrdua de pes, tremolor i letàrgia.                                                    |         |                     |         |               |                        |                        |
| <b>RIVASTIGMINA</b> | 1 – 10%                                                                                                                                                                                                                                                           | -       | ≥ 10%               | -       | 1 – 10%       | 1 – 10% <sup>(3)</sup> | 1 – 10% <sup>(4)</sup> |
|                     | <b>Pacients amb PARKINSON: Molt freqüents (&gt; o = 10%):</b> Tremolor. <b>Freqüents (1 – 10%):</b> Rigidesa muscular i trastorn de la marxa, hipersecreció salivar, Insomni, intranquil·litat, ansietat, deshidratació, bradicàrdia.                             |         |                     |         |               |                        |                        |
|                     | <b>Altres RAM: Freqüents (1 – 10%):</b> Anorèxia, hiperhidrosi, agitació, confusió, fatiga, astènia, mal estar, pèrdua de pes.                                                                                                                                    |         |                     |         |               |                        |                        |
| <b>MEMANTINA</b>    | 1 – 10%                                                                                                                                                                                                                                                           | 1 – 10% | 1 – 10%             | 1 – 10% | 1 – 10%       | -                      | 1 – 10% <sup>(5)</sup> |

GI: gastrointestinals

(1): **Molt Freqüents (> o = 10%):** Nàusees, diarrea. **Freqüents (1 – 10%):** Dolor abdominal, vòmits.

(2): **Molt Freqüents (> o = 10%):** Nàusees, vòmits. **Freqüents (1 – 10%):** Dolor abdominal, dispèpsia, mal estar abdominal i estomacal, diarrea.

(3): Més freqüents en pacients amb Parkinson: Empitjorament de la malaltia de Parkinson, Bradicinèsia, Discinèsia.

(4): **Molt Freqüents (> o = 10%):** Nàusees (38%), vòmits (23%), diarrea. **Freqüents (1 – 10%):** Dolor abdominal, dispèpsia.

(5): Estrenyiment



## Annexa 5. Ajust de dosi en Insuficiència renal (IR) o Insuficiència hepàtica (IH)<sup>27-41</sup>.

| ANTIDEPRESSIUS     |                                                                                                                                                      | IR                                                    |                  | IH                                                                                                                                                                                        |
|--------------------|------------------------------------------------------------------------------------------------------------------------------------------------------|-------------------------------------------------------|------------------|-------------------------------------------------------------------------------------------------------------------------------------------------------------------------------------------|
|                    | Cl=5-29ml/min                                                                                                                                        | Cl=30-49ml/min                                        | Cl=50-80ml/min   |                                                                                                                                                                                           |
| <b>CITALOPRAM</b>  | < 20 ml/min<br>Utilitzar amb precaució                                                                                                               | No ajust de dosi                                      | No ajust de dosi | Dosi Inicial 10mg/dia<br>(dosi màxima 20mg/dia)                                                                                                                                           |
| <b>SERTRALINA</b>  | -                                                                                                                                                    | -                                                     | -                | Pacients amb IH cas<br>reduir la dosi o<br>administrar-lo a<br>interval·ls menys<br>freqüents                                                                                             |
| <b>TRAZODONA</b>   | PRECAUCIÓ                                                                                                                                            | -                                                     | -                | Precaució<br>HEPATOTOXICITAT,<br>monitorització funció<br>hepàtica                                                                                                                        |
| <b>MIRTAZAPINA</b> | Cl <10ml/min<br>Disminució<br>clearance d'un<br>50%<br>Ajustar la dosi                                                                               | Cl=11-39ml/min<br>Disminució<br>clearance d'un<br>30% | -                | Ajustament de la dosi,<br>disminució clearance<br>un 30%                                                                                                                                  |
| <b>VENLAFAXINA</b> | Reduir 25 a 50% la dosi amb Cl = 10 – 70ml/min                                                                                                       |                                                       |                  | IH moderada – severa,<br>reduir la dosi 50%, en<br>alguns pacients cal una<br>reducció més elevada<br>de la dosi.                                                                         |
| ANTIPSIÒTICS       |                                                                                                                                                      | IR                                                    |                  | IH                                                                                                                                                                                        |
|                    | Cl=5-29ml/min                                                                                                                                        | Cl=30-49ml/min                                        | Cl=50-80ml/min   |                                                                                                                                                                                           |
| <b>RISPERIDONA</b> | Reduir a la meitat la dosi en cas<br>d'IR moderada o severa<br>L'ajust de la dosi en cas d'IR i/o IH s'ha de realitzar més lentament i amb precaució |                                                       | -                | Reduir a la meitat de la<br>dosi en cas d'IH                                                                                                                                              |
| <b>QUETIAPINA</b>  | -                                                                                                                                                    | -                                                     | -                | Cal ajust de la dosi en<br>cas d'IH<br>L'ajust de la dosi ha de ser progressiva i molt lenta. L'aclarament de la Quetiapina està reduït d'un 30 a un 50% més respecte als pacients joves. |
| IACE               |                                                                                                                                                      | IR                                                    |                  | IH                                                                                                                                                                                        |
|                    | Cl=5-29ml/min                                                                                                                                        | Cl=30-49ml/min                                        | Cl=50-80ml/min   |                                                                                                                                                                                           |
| <b>DONEPEZILLO</b> | ?                                                                                                                                                    | No ajust dosi                                         | No ajust dosi    | No recomanat en IH<br>greu                                                                                                                                                                |
| <b>GALANTAMINA</b> | < 9ml/min<br>CONTRAINDICAT                                                                                                                           | No ajust dosi                                         | No ajust dosi    | IH greu<br>CONTRAINDICAT                                                                                                                                                                  |

|                     |                             |                                            |               |                            |
|---------------------|-----------------------------|--------------------------------------------|---------------|----------------------------|
| <b>RIVASTIGMINA</b> | Monitorització ↑<br>les RAM | No ajust dosi                              | No ajust dosi | No recomanat en IH<br>greu |
| <b>MEMANTINA</b>    | 10mg/dia                    | 10mg/dia i si<br>tolera provar<br>20mg/dia | No ajust dosi | No recomanat en IH<br>greu |

|                      | ALTRES                                                           | IR                               |                                  | IH                                |
|----------------------|------------------------------------------------------------------|----------------------------------|----------------------------------|-----------------------------------|
|                      |                                                                  | Cl=5-29ml/min                    | Cl=30-49ml/min                   |                                   |
| <b>OXCARBAZEPINA</b> | Cl < 30ml/min,<br>reducció de la<br>dosi inicial a la<br>meitat. | -                                | -                                | No hi ha estudis en IH<br>servera |
| <b>CLOMETIAZOL</b>   |                                                                  | Utilitzar amb precaució          |                                  | Utilitzar amb precaució           |
| <b>LORAZEPAM</b>     | No ajust dosi,<br>però precaució                                 | No ajust dosi,<br>però precaució | No ajust dosi,<br>però precaució | No ajust dosi, però<br>precaució  |

## **BIBLIOGRAFIA**

1. Scottish Intercollegiate Guidelines Network. Management of patients with dementia. A national clinical guideline. February 2006.
2. Steinberg M et al. Point and 5-year period prevalence of neuropsychiatric symptoms in dementia: the Cache County Study. *Int J Geriatr Psychiatry* 2008. 23; 170-177.
3. García-Alberca JM, Lara Muñoz P, Berthier Torres M. Neuropsychiatric and behavioral symptomatology in Alzheimer disease. *Actas Esp Psiquiatr*. 2010. 38(4): 212 – 222.
4. McShane R, Gedling K, Keene J et al. Getting lost in dementia: a longitudinal study of a behavioral symptom. *Int Psychogeriatr* 1998. 10(3): 253-60.
5. Gómez-Pavón J, González García P, Francés Román I, et al. Recomendaciones en la prevención de reacciones adversas a medicamentos en personas mayores con demencia. *Rev Esp Geriatr Gerontol* 2010. 45(2): 89-96.
6. Pelegrin Valero C. Marta Moreno E, Corbera Almajano M. Tratamiento sintomático de las demencias, *Actas Esp Psiquiatr Monogr* 2005. 3: 18-31.
7. Logsdon RG, McCurry SM, Teri L. Evidence-based psychological treatments for disruptive behaviors in individuals with dementia. *Psychol and Aging* 2007. 2: 28-36.
8. Teri L, Gibbons LE, McCurry SM, Logsdon RG, Buchner DM, Barlow WE et al. Exercise plus behavioral management in patients with Alzheimer's disease: a randomized controlled trial. *JAMA* 2003. 290: 2015-2022.
9. Gay KF. Managing agitation and difficult behavior in dementia. *Clin Geriatr Med* 2004. 20: 69-82.
10. Guía de práctica clínica sobre la atención integral a las personas con enfermedad de Alzheimer y otras demencias. Guías de práctica clínica en el SNS. Ministerio de sanidad, Política Social e Igualdad. 2011.
11. Brodaty H, Burns K. Non-pharmacological Management of Apathy in Dementia: A systematic review. *Am J geriatr Psychiatry* 2011. 00: 1 – 16.
12. Berman K, Brodaty H, Withall A, Seeber K. Pharmacological treatment of Apathy in Dementia. *Am J geriatr Psychiatry* 2011. 00: 1 – 19.
13. Sink KM, Holden KF, Yaffe K. Pharmacological Treatment of Neuropsychiatric Symptoms of Dementia. A review of Evidence. *JAMA* 2005. 293(5): 596 – 608.
14. Zec RF, Burkett NR. Non-pharmacological and pharmacological treatment of the cognitive and behavioral symptoms of Alzheimer disease. *NeuroRehabilitation* 2008. 23: 425 – 438.
15. Omelan C. Approach to managing behavioral disturbances in dementia. *Can Fam Physician* 2006. 52: 191 – 199.
16. Ballard C, Howard R. Neuroleptic drugs in dementia: benefits and harm. *Nat Rev Neurosci* 2006. 7: 492-500.
17. Schneider LS, Dagerman K, Insel PS. Efficacy and adverse effects of atypical antipsychotics for dementia: meta-analysis of randomized, placebo-controlled trials. *Am J Geriatr Psychiatry* 2006. 14: 191-210.
18. La neuropsiquiatría de la enfermedad de Alzheimer y demencias relacionadas. Cummings JL. Atlas Medical Publishing Ltd. 2004. Edición española.

19. Teri L., Logsdon RG, McCurry SM. Nonpharmacologic treatment of behavioral disturbance in dementia. *Med Clin of North Am* 2002. 86: 641-656.
20. Banerjee S. The use of antipsychotic medication for people with dementia: time for action. A report for the Minister of State for Care Services. Department of Health, London, 2009.
21. Vitiello MV, Borson S. Sleep disturbances in patients with Alzheimer's disease. *CNS Drugs*. 2001; 15(10): 777 – 796.
22. Zec F R, Burkett NR. Non-pharmacological and pharmacological treatment of the cognitive and behavioral symptoms of Alzheimer disease. *Neuro Rehabilitation* 23 (2008): 425 – 438.
23. E Delgado, M Muñoz, B Montero, C Sánchez, PF Gallagher, A Cruz-Jentoft. Prescripción inapropiada de medicamentos en los pacientes mayores: los criterios STOPP/START. *Rev Esp Geriatr Gerontol*. 2009; 44(5): 273-279.
24. Jones RM, Arlidge J, Gillham R, Reagu S, Van den Bree M, Taylor P. Efficacy of mood stabilizers in the treatment of impulsive or repetitive aggression: systematic review and meta-analysis. *Br J Psych*. 2011. 198: 93 – 98.
25. Valle Fernandez J. Estabilizadores del estado de ánimo. En: de la Serna de Pedro I, ed *Psicofármacos en geriatría*. Barcelona: Ars Medica 2006.
26. Cohen-Mansfield J. Agitated behaviors in the elderly: II-Preliminary results in the cognitively deteriorated. *J Am Geriatr Soc* 1986. 34: 722-727.
27. TP Sembla, JL Beizer, MD Higbee. *Geriatric Dosage Handbook*. 17th ed. Lexicomp Drug Reference Handbooks. 2012.
28. Fitxa tècnica Risperdal [consultada abril 2012]  
<http://www.aemps.gob.es/cima/especialidad.do?metodo=verFichaWordPdf&codigo=65696&formato=pdf&formulario=FICHAS&file=ficha.pdf>
29. Fitxa tècnica de Quetiapina Alter EFG [Consultada abril 2012]  
<http://www.aemps.gob.es/cima/especialidad.do?metodo=verFichaWordPdf&codigo=69556&formato=pdf&formulario=FICHAS&file=ficha.pdf>
30. Fitxa tècnica Citalopram Stada EFG [Consultada abril 2012]  
<http://www.aemps.gob.es/cima/especialidad.do?metodo=verFichaWordPdf&codigo=66035&formato=pdf&formulario=FICHAS&file=ficha.pdf>
31. Fitxa tècnica Sertralina Edigen EFG [Consultada abril 2012]  
<http://www.aemps.gob.es/cima/especialidad.do?metodo=verFichaWordPdf&codigo=66049&formato=pdf&formulario=FICHAS&file=ficha.pdf>
32. Fitxa tècnica Deprax [Consultada abril 2012]  
<http://www.aemps.gob.es/cima/especialidad.do?metodo=verFichaWordPdf&codigo=51612&formato=pdf&formulario=FICHAS&file=ficha.pdf>
33. Fitxa tècnica Mirtazapina Mylan EFG [Consultada abril 2012]  
<http://www.aemps.gob.es/cima/especialidad.do?metodo=verFichaWordPdf&codigo=69077&formato=pdf&formulario=FICHAS&file=ficha.pdf>

34. Fitxa tècnica Venlafaxina Bexal EFG [Consultada abril 2012]  
<http://www.aemps.gob.es/cima/especialidad.do?metodo=verFichaWordPdf&codigo=66702&formato=pdf&formulario=FICHAS&file=ficha.pdf>
35. Fitxa tècnica Oxcarbazepina Normon EFG [Consultada abril 2012]  
<http://www.aemps.gob.es/cima/especialidad.do?metodo=verFichaWordPdf&codigo=73651&formato=pdf&formulario=FICHAS&file=ficha.pdf>
36. Martindale. The Extra Pharmacopoeia. 31th edition.
37. Fitxa tècnica Lorazepam Cinfa EFG [Consultada abril 2012]  
<http://www.aemps.gob.es/cima/especialidad.do?metodo=verFichaWordPdf&codigo=68477&formato=pdf&formulario=FICHAS&file=ficha.pdf>
38. Fitxa tècnica Aricept [Consultada abril 2012]  
<http://www.aemps.gob.es/cima/especialidad.do?metodo=verFichaWordPdf&codigo=68214&formato=pdf&formulario=FICHAS&file=ficha.pdf>
39. Fitxa tècnica Reminyl [Consultada abril 2012]  
<http://www.aemps.gob.es/cima/especialidad.do?metodo=verFichaWordPdf&codigo=66652&formato=pdf&formulario=FICHAS&file=ficha.pdf>
40. Fitxa tècnica Exelon [Consultada abril 2012]  
[http://www.ema.europa.eu/ema/index.jsp?curl=pages/medicines/human/medicines/000169/human\\_med\\_000777.jsp&mid=WC0b01ac058001d124&jsenabled=true](http://www.ema.europa.eu/ema/index.jsp?curl=pages/medicines/human/medicines/000169/human_med_000777.jsp&mid=WC0b01ac058001d124&jsenabled=true)
41. Fitxa tècnica Axura [Consultada abril 2012]  
[http://www.ema.europa.eu/ema/index.jsp?curl=pages/medicines/human/medicines/000378/human\\_med\\_000665.jsp&mid=WC0b01ac058001d124](http://www.ema.europa.eu/ema/index.jsp?curl=pages/medicines/human/medicines/000378/human_med_000665.jsp&mid=WC0b01ac058001d124)
